# Supplementary material
Source: publisher site journal article supplement (https://www.e-cmh.org/upload/media/cmh-2018-0054-suppl4.pdf)
Supplement: Supplementary file 1 [file cmh-2018-0054-suppl4.pdf]

**Supplementary Table 1.** Treatment outcomes of antiviral therapy in entire population and subgroups with and without hepatic steatosis

| Variables                     | All patients (n=334) | Patients with hepatic steatosis (n=146, 43.7%) | Patients without hepatic steatosis (n=188, 56.3%) |
|-------------------------------|----------------------|------------------------------------------------|---------------------------------------------------|
| HBeAg loss*                   |                      |                                                |                                                   |
| n (HBeAg-positive)            | 172                  | 80                                             | 92                                                |
| 1-year                        | 9 (5.2)              | 4 (5.0)                                        | 5 (5.4)                                           |
| 3-years                       | 32 (18.6)            | 10 (12.5)                                      | 22 (23.9)                                         |
| 5-years                       | 37 (21.5)            | 11 (13.8)                                      | 26 (28.3)                                         |
| Complete virological response |                      |                                                |                                                   |
| 1-year                        | 218 (65.3)           | 88 (60.3)                                      | 130 (69.1)                                        |
| 3-years                       | 300 (89.8)           | 126 (86.3)                                     | 174 (92.6)                                        |
| 5-years                       | 303 (90.7)           | 127 (87.0)                                     | 176 (93.6)                                        |
| Hepatocellular carcinoma      |                      |                                                |                                                   |
| 1-year                        | 6 (1.8)              | 1 (0.7)                                        | 5 (2.7)                                           |
| 3-years                       | 16 (4.8)             | 5 (3.4)                                        | 11 (5.9)                                          |
| 5-years                       | 25 (7.5)             | 8 (5.5)                                        | 17 (9.0)                                          |

Variables are expressed as n or n (%).

HBeAg, hepatitis B e antigen.

\*The rate of HBeAg loss was calculated among HBeAg-positive patients.
